# Supplementary material for: Derivatization-assisted immunoassays: application for group-specific detection of potent methamphetamine and amphetamine enantiomers
Source: Royal Society of Chemistry journal article supplement (doi:10.1039/d2ay00940d), 2022-01-01
Supplement: d2ay00940d1.pdf [file d2ay00940d1.pdf]

*Electronic supplementary information*

## Derivatization-assisted immunoassays: application for group-specific detection of potent methamphetamine and amphetamine enantiomers

Izumi Morita,<sup>a</sup> Yuki Kiguchi,<sup>a</sup> Hiroyuki Oyama,<sup>a</sup> Kouya Yamaki,<sup>a</sup> Nami Sakio,<sup>a</sup> Keisuke Kashiwabara,<sup>a</sup> Yumi Kuroda,<sup>a</sup> Aya Ito,<sup>a</sup> Asaka Yokota,<sup>a</sup> Natsumi Ikeda,<sup>a</sup> Ruri Kikura-Hanajiri,<sup>b</sup> Hiroshi Ueda,<sup>c</sup> Satoshi Numazawa,<sup>d</sup> Takemi Yoshida<sup>de</sup> and Norihiro Kobayashi<sup>\*a</sup>

<sup>a</sup>Kobe Pharmaceutical University, 4-19-1, Motoyama-Kitamachi, Higashinada-ku, Kobe 658-8558, Japan

<sup>b</sup>National Institute of Health Sciences, 3-25-26, Tonomachi, Kawasaki-ku, Kawasaki 210-9501, Japan

<sup>c</sup>Laboratory for Chemistry and Life Science, Institute of Innovative Research, Tokyo Institute of Technology, 4259 Nagatsuta-cho, Midori-ku, Yokohama, 226-8503, Japan

<sup>d</sup>Department of Pharmacology, Toxicology, and Therapeutics, Showa University School of Pharmacy, 1-5-8 Hatanodai, Shinagawa-ku, Tokyo 142-8555, Japan

<sup>e</sup>Council on Pharmacists Credentials, 1-9-2 Nishi-shinbashi, Minato-ku, Tokyo 105-0003, Japan

### Preparation of immunogenic hapten–albumin conjugates

Two kinds of immunogenic conjugates, Teoc-(*S*)-MAP–BSA and Teoc-(*S*)-AP–BSA, were prepared in a parallel manner as follows (see Fig. 2 in the text). The starting substances 3-[(2*S*)-2-(methylamino)propyl]phenol [(+)-MAPOH] and 3-[(2*S*)-2-aminopropyl]-phenol [(*S*)-APOH] were obtained as hydrochlorides from Netchem Inc (Brantford, ON, Canada).

Teoc-*O*-succinimidyl (3.0 eq)<sup>1</sup> and 4-(*N,N*-dimethylamino)pyridine (0.5 eq) were added to solutions of (*S*)-MAPOH 1 (80 mg) or (*S*)-APOH 1' (72 mg), each dissolved in tetrahydrofuran (THF; 0.5 mL) and pyridine (0.5 mL). These mixtures were stirred at room temperature for 1 h, and then diluted with H<sub>2</sub>O and extracted with CHCl<sub>3</sub>. After removing the solvent, the residues were chromatographed on a silica gel with CHCl<sub>3</sub>–methanol (30:1) to give Teoc-(*S*)-MAPOH 2 (64 mg) and Teoc-(*S*)-APOH 2' (137 mg), respectively, as a colorless oil. For compound 2, <sup>1</sup>H-

NMR (300 MHz; CDCl<sub>3</sub>),  $\delta$ : 0.04 (9H, s), 0.87-0.92 (2H, m), 2.01 (3H, s), 2.64-2.72 (2H, m), 2.97 (3H, s), 4.04-4.06 (2H, m), 4.41-4.47 (1H, m), 6.61-6.68 (3H, m), 7.04 (1H, m). HR-MS  $m/z$ : 308.1690 (Calcd for C<sub>16</sub>H<sub>26</sub>NO<sub>3</sub>Si: 308.1677, [M-H]<sup>+</sup>); for compound 2',  $\delta$ : 0.03 (9H, s), 0.85-0.92 (2H, m), 1.00 (3H, d,  $J$ =6.6 Hz), 2.42-2.72 (2H, m), 3.70-3.81 (1H, m), 3.89-4.05 (2H, m), 6.56-6.60 (3H, m), 7.00 (1H, t,  $J$ =7.8 Hz). HR-MS  $m/z$ : 318.1506 (Calcd for C<sub>15</sub>H<sub>24</sub>NO<sub>3</sub>SiNa: 318.1496, [M+Na]<sup>+</sup>). Glutaric anhydride (20 eq) and 4-(*N,N*-dimethylamino)pyridine (0.5 eq) were added to solutions of the carbamate 2 (42 mg) and 2' (80 mg), each dissolved in pyridine (1.0 mL or 2.0 mL), and the mixtures were stirred at room temperature overnight. Then, these reaction mixtures were diluted with 5% HCl (pH 2), and extracted with CHCl<sub>3</sub>. After removing the solvent, the residues run over a column packed with Supelpak-2 to yield Teoc-(*S*)-MAPOH-suc 3 (26 mg) and Teoc-(*S*)-APOH-suc 3' (56 mg), respectively, as a colorless oil. For compound 3, <sup>1</sup>H-NMR (600 MHz; CDCl<sub>3</sub>),  $\delta$ : 0.02 (9H, s), 0.70-0.75 (2H, m), 0.97 (3H, s), 1.82 (2H, t,  $J$ =7.5 Hz), 2.24 (2H, t,  $J$ =7.5 Hz), 2.44 (2H, t,  $J$ =7.5 Hz), 2.52-2.54 (2H, m), 3.11 (3H, s), 3.85-3.91 (2H, m), 4.21-4.29 (1H, m), 6.69 (1H, s), 6.71 (1H, s), 6.78-6.88 (1H, m), 7.07 (1H, t,  $J$ =7.5 Hz). HR-MS  $m/z$ : 424.2151 (Calcd for C<sub>21</sub>H<sub>34</sub>NO<sub>6</sub>Si: 424.2150, [M+H]<sup>+</sup>); for compound 3',  $\delta$ : 0.02 (9H, s), 0.70-0.75 (2H, m), 1.07 (3H, s), 1.92-1.97 (2H, m), 2.38-2.43 (2H, m), 2.59-2.64 (4H, m), 3.78-3.84 (2H, m), 4.01-4.07 (H, m), 6.89 (1H, s), 6.89 (1H, d,  $J$ =6.0 Hz), 7.04 (1H, d,  $J$ =6.0 Hz), 7.24 (1H, t,  $J$ =6.0 Hz). HR-MS  $m/z$ : 410.2003 (Calcd for C<sub>20</sub>H<sub>32</sub>NO<sub>6</sub>Si: 410.1907, [M+H]<sup>+</sup>).

1-Ethyl-3-(3-dimethylaminopropyl)carbodiimide hydrochloride (5.0 eq) and *N*-hydroxysuccinimide (NHS; 5.0 eq) were added to solutions of succinate 3 (25 mg) and 3' (56 mg), each dissolved in 95% 1,4-dioxane (1.0 mL).<sup>2</sup> The mixtures were stirred at room temperature for 2 h, then diluted with water and extracted with ethyl acetate. After removing the solvent, crude NHS esters (4 and 4', respectively) were obtained as a colorless oil, a portion of which [6.3 mg, (12  $\mu$ mol) and 15 mg (30  $\mu$ mol), respectively] were then reacted with bovine serum albumin (BSA) [40 mg, (0.60  $\mu$ mol) or 100 mg, (1.5  $\mu$ mol), respectively; Sigma–Aldrich (St. Louis, MO, USA)] dissolved in pyridine–PB (1:4, 2.5 mL) with stirring at room temperature for 3 h and then at 4°C overnight. These reaction mixtures were dialyzed as described previously,<sup>3-7</sup> and desired Teoc-(*S*)-MAP–BSA and Teoc-(*S*)-AP–BSA were obtained as 1.7 mg/mL and 3.0 mg/mL solutions in saline. The hapten/BSA coupling molar ratio was determined to be 36:1 and 6:1, respectively, as described above.<sup>3-7</sup>

### Preparation of Teoc-(*S*)-MAP–biotin and Teoc-(*S*)-AP–biotin indirect conjugates

As the probe molecules for screening the production of anti-(*S*)-MAP or anti-(*S*)-AP antibodies from hybridomas, we prepared Teoc-(*S*)-MAP–biotin and Teoc-(*S*)-AP–biotin indirect conjugates by labeling Teoc-(*S*)-MAPOH (or -APOH) and biotin moieties together on poly-L-

lysine molecules. This was aimed to avoid possible false-positive bindings by anti-BSA antibodies when we screen hybridoma supernatants with ELISAs using microplates coated with Teoc-(*S*)-MAP (or -AP)-BSA conjugates. The mixtures of Crude NHS ester 4 and 4' (5.3 mg, 10  $\mu$ mol) dissolved in 1,4-dioxane (50  $\mu$ L) and EZ-link NHS-LC-Biotin (Thermo Fisher Scientific; Waltham, MA, USA) (4.5 mg) dissolved in *N,N*-dimethylformamide (50  $\mu$ L) were added to a solution of poly-L-lysine hydrobromide ( $M_r$  4,000–15,000; Sigma–Aldrich) (5.0 mg) in PB (3.0 mL). Subsequently, the mixtures were stirred at room temperature for 1 h and then overnight at 4°C. The resulting solutions were dialyzed against 50 mM PB for 1 day, and adjusted to contain *ca.* 1 mg/mL (calculated as unmodified poly-L-lysine) of the indirect Teoc-(*S*)-MAP–biotin or Teoc-(*S*)-AP–biotin conjugate in G-PBS.

### **Scheme of immunization of mice for mAbs generation**

Five BALB/c and five A/J mice (female, 8 weeks of age) were repeatedly immunized with Teoc-(*S*)-MAP–BSA and Teoc-(*S*)-AP–BSA as shown in the Fig. S1. Selected mice (shadowed), which showed favorable humoral immune responses, were received a final immunization, and their splenocytes were used for the cell fusion experiments.

### **ELISA for screening hybridomas secreting desirable antibodies**

Costar #3590 96-well microplates (Corning; Corning, NY, USA) were coated with a 5.0- $\mu$ g/mL solution of streptavidin (Thermo Fisher Scientific) in 0.10 M carbonate buffer (pH 8.6) (100  $\mu$ L/well) overnight at 4°C, and then blocked with M-PBS at 37°C for 60 min. The wells were washed three times with T-PBS, and then a solution of the Teoc-(*S*)-MAP–biotin or Teoc-(*S*)-AP–biotin indirect conjugate (see above) in PVG-PBS (1  $\mu$ g mL<sup>-1</sup>; 100  $\mu$ L per well) was added and incubated at 37°C for 60 min. After washing similarly, hybridoma supernatants diluted with G-PBS (100  $\mu$ L per well) were added, mixed, and the plates were incubated at 37°C for further 60 min. Subsequently, the wells were washed and probed with a 160-ng mL<sup>-1</sup> solution of goat anti-mouse IgG (Fc-specific) antibody conjugated with peroxidase (POD) (Jackson ImmunoResearch; West Grove, PA, USA) diluted in G-PBS (100  $\mu$ L per well). After incubation at 37°C for 30 min, the wells were washed and the POD activity was determined colorimetrically at 490 nm using *o*-phenylenediamine as the hydrogen donor.<sup>3-7</sup>

### **Synthesis of Teoc derivatives**

#### **(a) Teoc-(*S*)-MAP**

Teoc-*O*-succinimidyl (3.0 eq) was added to a solution of (*S*)-MAP hydrochloride (152 mg) dissolved in THF (0.5 mL) and pyridine (0.5 mL). This mixture was stirred at room temperature for 1 h. The crude product was chromatographed on silica gel with hexane–ethyl acetate (1 : 1)

to yield Teoc-(S)-MAP (167 mg) as a white solid. HR-MS  $m/z$ : 316.1705 (Calcd for  $C_{16}H_{27}NO_2NaSi$ : 316.1770,  $[M+Na]^+$ ).

**(b) Teoc-(S)-AP**

(S)-AP sulfate (5 mg) dissolved in  $H_2O$  was adjusted to pH 9.5 with 5%  $Na_2CO_3$ , and then extracted with ethyl acetate. After removing the solvent, the residue was dissolved in THF (0.5 mL) and pyridine (0.5 mL), and Teoc-*O*-succinimidyl (3.0 eq) was added. This mixture was stirred at room temperature for 1 h, and then the crude product was chromatographed on silica gel with chloroform to yield Teoc-(S)-AP (4.5 mg) as a white solid. HR-MS  $m/z$ : 302.1546 (Calcd for  $C_{15}H_{25}NO_2NaSi$ : 302.1550,  $[M+Na]^+$ ).

**(c) Teoc-tyramine**

Teoc-*O*-succinimidyl (3.0 eq) was added to a solution of tyramine hydrochloride (100 mg) dissolved in THF (2.0 mL) and pyridine (2.0 mL). This mixture was stirred at room temperature for 1 h. The crude product was chromatographed on silica gel with chloroform–methanol (30 : 1) to yield Teoc-tyramine (87 mg) as a white solid. HR-MS  $m/z$ : 304.1338 (Calcd for  $C_{14}H_{23}NO_3NaSi$ : 304.1343,  $[M+Na]^+$ ).

**(d) Teoc-dopamine**

Teoc-*O*-succinimidyl (3.0 eq) was added to solutions of dopamine hydrochloride (100 mg) dissolved in THF (2.0 mL) and pyridine (2.0 mL). This mixture was stirred at room temperature for 1 h. The crude product was chromatographed on silica gel with chloroform–methanol (30 : 1) to yield Teoc- dopamine (52 mg) as a white solid. HR-MS  $m/z$ : 296.1323 (Calcd for  $C_{14}H_{22}NO_4Si$ : 296.1324,  $[M-H]^+$ ).

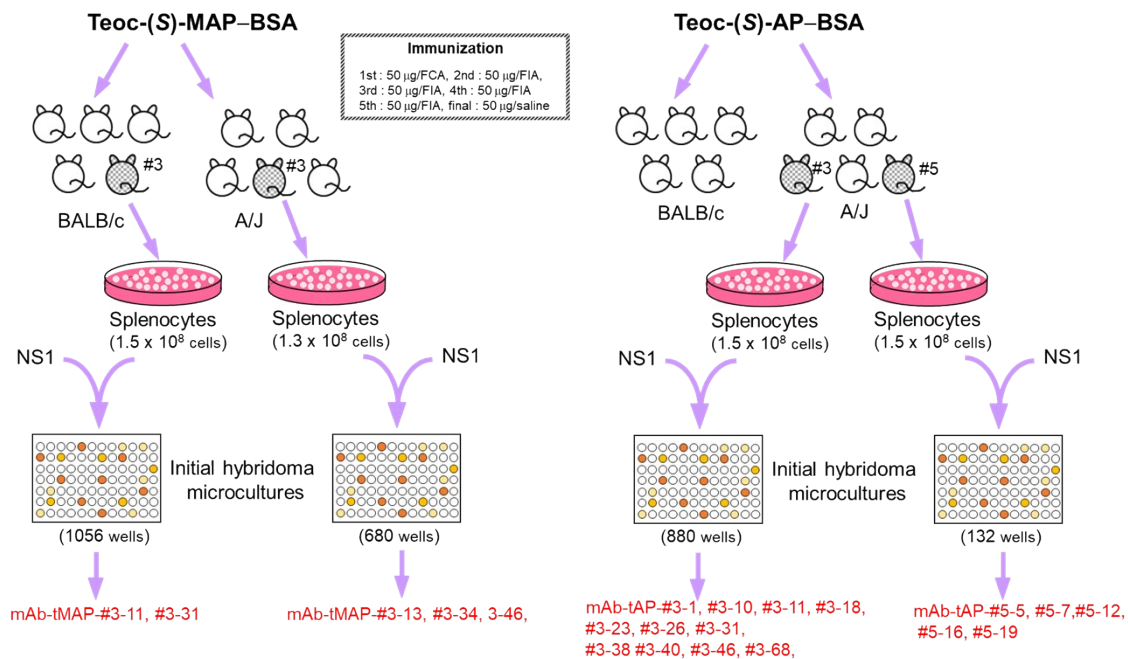

**Fig. S1** Schematic illustrations of the immunization of animals, cell fusion, and production of monoclonal antibodies. Each mouse was immunized with subcutaneous injection of 50 µg Teoc-(S)-MAP-BSA or Teoc-(S)-AP-BSA at multiple sites on the back with an emulsion of Freund's complete adjuvant (FCA). Then, booster immunizations were given 4 times (biweekly interval) with adjuvant (FIA) and saline (1:1, 0.2 mL). The selected four mice (shadowed) that showed favorable humoral responses were received the final immunization with 50 µg Teoc-(S)-MAP-BSA or Teoc-(S)-AP-BSA in their spleen. The splenocytes were collected from these mice and fused with NS1 myeloma. Number of initial hybridoma microcultures and abbreviations of finally established antibody-secreting hybridoma clones, concerning each fusion experiment, are shown.

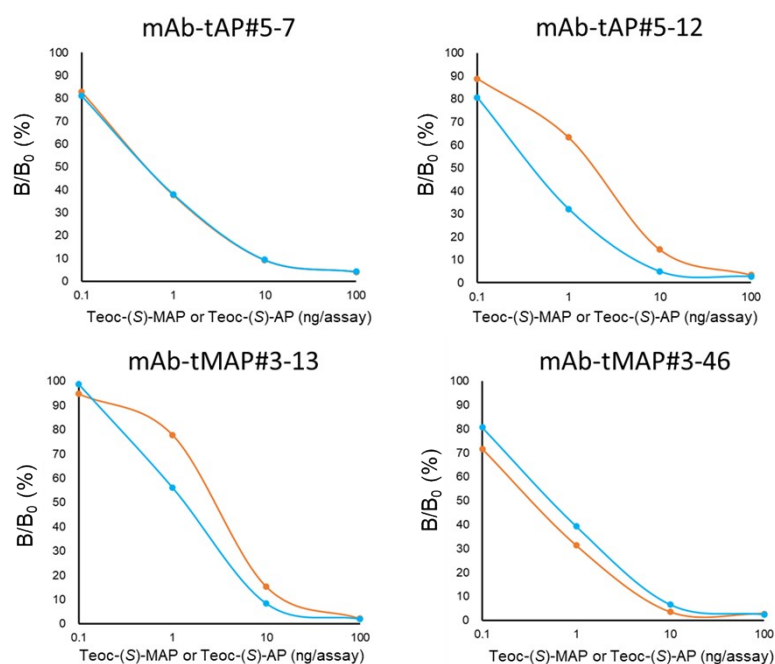

**Fig. S2** Dose–response curves of the competitive ELISA for Teoc-(S)-MAP (blue) and Teoc-(S)-AP (orange) using four selected mAbs.

## References

1. R. E. Shute and D. H. Rich, *Synthesis*, 1987, 346–349.
2. H. Hosoda, Y. Sakai, H. Yoshida, S. Miyairi, K. Ishii and T. Nambara, *Chem. Pharm. Bull.*, 1979, **27**, 742–746.
3. M. Okuyama, N. Kobayashi, W. Takeda, T. Anjo, Y. Matsui, J. Goto, A. Kambegawa and S. Hori, *Anal. Chem.*, 2004, **76**, 1948–1956.
4. I. Morita, H. Oyama, M. Yasuo, K. Matsuda, K. Katagi, A. Ito, H. Tatsuda, H. Tanaka, S. Morioka and N. Kobayashi, *Biol. Pharm. Bull.*, 2017, **40**, 174–181.
5. I. Morita, H. Oyama, Y. Kanda, M. Yasuo, A. Ito, M. Toyota, Y. Hayashi, T. Yokoyama and N. Kobayashi, *Biol. Pharm. Bull.*, 2018, **41**, 123–131.
6. I. Morita, H. Oyama, Y. Kiguchi, A. Oguri, N. Fujimoto, A. Takeuchi, R. Tanaka, J. Ogata, R. Kikura-Hanajiri and N. Kobayashi, *J. Pharmaceut. Biol. Anal.*, 2020, **190**, 113485.
7. I. Morita, Y. Kiguchi, H. Oyama, A. Takeuchi, C. Tode, R. Tanaka, J. Ogata, R. Kikura-Hanajiri and N. Kobayashi, *Anal. Methods*, 2021, **13**, 3954–3962.
